# Supplementary material for: Integrated Analysis of miRNAs Associated With Sugarcane Responses to Low-Potassium Stress
Source: Front Plant Sci. 2022 Jan 4;12:750805. doi: 10.3389/fpls.2021.750805 (PMC8763679; doi:10.3389/fpls.2021.750805)
Supplement: Supplementary Table 12 — KEGG annotation of putative target mRNAs of DEMs. [file Table_12.XLS]

## Sheet: gene.path
KEGG_A_class	KEGG_B_class	Pathway	gene (220)	All (6276)	Pvalue	Qvalue	Pathway ID	Genes	K_IDs
Cellular Processes	Transport and catabolism	Autophagy - other eukaryotes	7	38	0.000295	0.00248	ko04136	PB.6757.1(ATG18B);PB.7568.1(ATG18B);PB.8510.1(ATG10);PB.8845.1(ATG10);PB.8845.2(ATG10);PB.9162.1(ATG10);PB.9590.1(ATG10)	K17908+K17908+K17888+K17888+K17888+K17888+K17888
Cellular Processes	Transport and catabolism	Phagosome	16	211	0.00285778	0.0143	ko04145	PB.2185.1(TUBB2);PB.2185.2(TUBB1);PB.2451.1(TUBB7);PB.2451.2(TUBB7);PB.3547.1(CRT);PB.3547.2(CRT);PB.3547.3(CRT);PB.3547.4(CRT);PB.3547.5(CRT);PB.3547.6(CRT);PB.3547.7(CRT);PB.4560.1(CRT);PB.599.1(TUBB7);PB.699.1(TUBB1);PB.7083.1(VHA-A);PB.7083.2(CVA69.24)	K07375+K07375+K07375+K07375+K08057+K08057+K08057+K08057+K08057+K08057+K08057+K08057+K07375+K07375+K02145+K02145
Cellular Processes	Transport and catabolism	Peroxisome	11	149	0.0151701	0.0531	ko04146	PB.12846.1(LACS4);PB.13639.1(LACS4);PB.235.1(SODCC.3);PB.2964.1(SODCC.1);PB.2964.2(SODCC.1);PB.3235.1(SODCC.1);PB.3235.2(SODCC.1);PB.3909.1(SODCC.1);PB.3909.2(SODCC.1);PB.958.1(SODCC.3);PB.958.3(SODCC.3)	K01897+K01897+K04565+K04565+K04565+K04565+K04565+K04565+K04565+K04565+K04565
Cellular Processes	Transport and catabolism	Endocytosis	2	232	0.997886	1	ko04144	PB.4244.1(At3g05520);PB.5902.1(SNX1)	K10364+K17917
Environmental Information Processing	Signal transduction	MAPK signaling pathway - plant	12	129	0.00178621	0.01	ko04016	PB.12633.1(MPK4);PB.12926.1(MPK4);PB.4112.1(PRMS);PB.4114.1(PRMS);PB.4114.2(PRMS);PB.4115.1(PRMS);PB.4115.3(PRMS);PB.6110.1(NDK4);PB.6110.2(NDK4);PB.6397.1(SAPK4);PB.6397.2(SAPK4);PB.7581.1(ERECTA)	K20535+K20535+K13449+K13449+K13449+K13449+K13449+K00940+K00940+K14498+K14498+K20718
Environmental Information Processing	Signal transduction	Plant hormone signal transduction	12	205	0.0557328	0.167	ko04075	PB.11072.1(GH3.5);PB.11072.2(GH3.5);PB.11072.3(GH3.5);PB.11072.4(GH3.5);PB.4112.1(PRMS);PB.4114.1(PRMS);PB.4114.2(PRMS);PB.4115.1(PRMS);PB.4115.3(PRMS);PB.6397.1(SAPK4);PB.6397.2(SAPK4);PB.8555.1(RR1)	K14506+K14506+K14506+K14506+K13449+K13449+K13449+K13449+K13449+K14498+K14498+K14492
Environmental Information Processing	Signal transduction	Phosphatidylinositol signaling system	4	73	0.25274	0.514	ko04070	PB.12508.1(DGK2);PB.12508.2(DGK2);PB.8717.1(IPK1);PB.8717.2(IPK1)	K00901+K00901+K10572+K10572
Genetic Information Processing	Replication and repair	Nucleotide excision repair	4	49	0.0915693	0.248	ko03420	PB.1029.1(ssb1);PB.5072.1(RBX1A);PB.5661.1(DDB2);PB.6625.1(RBX1A)	K07466+K03868+K10140+K03868
Genetic Information Processing	Transcription	Basal transcription factors	3	46	0.217623	0.482	ko03022	PB.11355.1(TFIIAy);PB.12124.2(TFIIAy);PB.12474.1(TFIIAy)	K03123+K03123+K03123
Genetic Information Processing	Folding, sorting and degradation	Protein export	4	73	0.25274	0.514	ko03060	PB.1488.1(Gtp-bp);PB.15.1(Gtp-bp);PB.16.1(srpra);PB.2345.1(At2g22425)	K13431+K13431+K13431+K12946
Genetic Information Processing	Translation	Aminoacyl-tRNA biosynthesis	4	80	0.307879	0.601	ko00970	PB.10966.1(GATB);PB.10987.1(GATB);PB.6256.1(At4g33760);PB.8909.1(At1g29880)	K02434+K02434+K01876+K01880
Genetic Information Processing	Folding, sorting and degradation	Protein processing in endoplasmic reticulum	12	312	0.41272	0.754	ko04141	PB.13287.1(PUX4);PB.3547.1(CRT);PB.3547.2(CRT);PB.3547.3(CRT);PB.3547.4(CRT);PB.3547.5(CRT);PB.3547.6(CRT);PB.3547.7(CRT);PB.4560.1(CRT);PB.5072.1(RBX1A);PB.5575.1(PDIL2-2);PB.6625.1(RBX1A)	K14012+K08057+K08057+K08057+K08057+K08057+K08057+K08057+K08057+K03868+K09584+K03868
Genetic Information Processing	Transcription	RNA polymerase	2	51	0.538655	0.851	ko03020	PB.3113.1(NRPB9A);PB.4227.1(NRPB9B)	K03017+K03017
Genetic Information Processing	Replication and repair	Mismatch repair	1	31	0.670073	0.923	ko03430	PB.1029.1(ssb1)	K07466
Genetic Information Processing	Folding, sorting and degradation	SNARE interactions in vesicular transport	1	33	0.692911	0.924	ko04130	PB.2342.1(MEMB11)	K08496
Genetic Information Processing	Folding, sorting and degradation	Ubiquitin mediated proteolysis	5	171	0.722619	0.948	ko04120	PB.3808.1(COP10);PB.5072.1(RBX1A);PB.5661.1(DDB2);PB.6243.2(UBC23);PB.6625.1(RBX1A)	K20217+K03868+K10140+K10581+K03868
Genetic Information Processing	Replication and repair	Homologous recombination	1	38	0.743352	0.952	ko03440	PB.1029.1(ssb1)	K07466
Genetic Information Processing	Translation	Ribosome biogenesis in eukaryotes	2	79	0.771019	0.952	ko03008	PB.8049.1(At5g08180);PB.8767.1(SWA1)	K11129+K14549
Genetic Information Processing	Replication and repair	DNA replication	1	44	0.79311	0.966	ko03030	PB.1029.1(ssb1)	K07466
Genetic Information Processing	Translation	Ribosome	13	464	0.838514	1	ko03010	PB.11133.1(rpmA);PB.11379.1(rps7-A);PB.11883.1(rpmA);PB.14108.1(rps3);PB.2164.1(rps5);PB.3270.1(RPS3A);PB.3789.1(RPS3A);PB.441.1(rps5);PB.4864.1(RPS24A);PB.5164.2(RPS15AA);PB.6509.1(RPS24A);PB.7825.1(RPL11);PB.8330.1(rpsE)	K02899+K02992+K02899+K02982+K02988+K02984+K02984+K02988+K02974+K02957+K02974+K02868+K02988
Genetic Information Processing	Folding, sorting and degradation	Proteasome	2	118	0.92347	1	ko03050	PB.7802.1(PAF1);PB.8306.1(PAF1)	K02725+K02725
Genetic Information Processing	Translation	mRNA surveillance pathway	3	168	0.938612	1	ko03015	PB.13005.1(PP2AA1);PB.13005.2(PP2AA2);PB.13005.3(PP2AA1)	K03456+K03456+K03456
Genetic Information Processing	Folding, sorting and degradation	RNA degradation	2	130	0.94638	1	ko03018	PB.10815.1(CAF1-6);PB.12491.2(ENO2)	K12581+K01689
Genetic Information Processing	Translation	RNA transport	1	224	0.999709	1	ko03013	PB.7732.1(KPNB1)	K14293
Genetic Information Processing	Transcription	Spliceosome	1	316	0.999991	1	ko03040	PB.13135.1(PRP8A)	K12856
Metabolism	Amino acid metabolism	Histidine metabolism	9	26	1.26e-07	1.06e-05	ko00340	PB.12776.1(ALDH2B7);PB.13568.1(ALDH2B7);PB.13568.2(ALDH2B7);PB.6883.1(ALDH3F1);PB.6883.2(ALDH3F1);PB.7274.1(ALDH3F1);PB.7676.1(ALDH3F1);PB.7676.2(ALDH3F1);PB.7676.3(ALDH3F1)	K00128+K00128+K00128+K00128+K00128+K00128+K00128+K00128+K00128
Metabolism	Lipid metabolism	Fatty acid biosynthesis	11	55	2.35e-06	9.87e-05	ko00061	PB.12706.1(FATB1);PB.12706.2(FATB);PB.12846.1(LACS4);PB.13309.1(FATB1);PB.13502.2(FATB);PB.13502.3(FATB);PB.13639.1(LACS4);PB.7432.1(FATB);PB.7432.2(FATB1);PB.7432.3(FATB1);PB.7841.1(FATB)	K10781+K10781+K01897+K10781+K10781+K10781+K01897+K10781+K10781+K10781+K10781
Metabolism	Amino acid metabolism	Valine, leucine and isoleucine degradation	12	70	4.5e-06	0.000126	ko00280	PB.12776.1(ALDH2B7);PB.13568.1(ALDH2B7);PB.13568.2(ALDH2B7);PB.3383.1(HMGS);PB.3900.1(HMGS);PB.3902.1(HMGS);PB.6883.1(ALDH3F1);PB.6883.2(ALDH3F1);PB.7274.1(ALDH3F1);PB.7676.1(ALDH3F1);PB.7676.2(ALDH3F1);PB.7676.3(ALDH3F1)	K00128+K00128+K00128+K01641+K01641+K01641+K00128+K00128+K00128+K00128+K00128+K00128
Metabolism	Lipid metabolism	Cutin, suberine and wax biosynthesis	8	30	6.03e-06	0.000127	ko00073	PB.10212.1(HTH);PB.10534.1(HTH);PB.7293.1(At1g02190);PB.9882.1(HTH);PB.9882.2(HTH);PB.9882.3(HTH);PB.9882.4(HTH);PB.9882.5(HTH)	K15403+K15403+K15404+K15403+K15403+K15403+K15403+K15403
Metabolism	Lipid metabolism	Glycerophospholipid metabolism	16	129	9.51e-06	0.00016	ko00564	PB.11505.1(NMT2);PB.11505.2(NMT2);PB.12266.4(NMT2);PB.12266.5(NMT2);PB.12266.7(NMT2);PB.12266.8(NMT2);PB.12266.9(NMT2);PB.12508.1(DGK2);PB.12508.2(DGK2);PB.1297.1(NPC1);PB.1297.2(NPC1);PB.1297.3(NPC1);PB.1297.4(NPC1);PB.1297.5(NPC1);PB.648.1(NPC1);PB.648.2(NPC1)	K05929+K05929+K05929+K05929+K05929+K05929+K05929+K00901+K00901+K01114+K01114+K01114+K01114+K01114+K01114+K01114
Metabolism	Amino acid metabolism	Lysine degradation	9	49	4.11e-05	0.000575	ko00310	PB.12776.1(ALDH2B7);PB.13568.1(ALDH2B7);PB.13568.2(ALDH2B7);PB.6883.1(ALDH3F1);PB.6883.2(ALDH3F1);PB.7274.1(ALDH3F1);PB.7676.1(ALDH3F1);PB.7676.2(ALDH3F1);PB.7676.3(ALDH3F1)	K00128+K00128+K00128+K00128+K00128+K00128+K00128+K00128+K00128
Metabolism	Amino acid metabolism	Tryptophan metabolism	10	62	4.96e-05	0.000595	ko00380	PB.10596.1(TDC1);PB.12776.1(ALDH2B7);PB.13568.1(ALDH2B7);PB.13568.2(ALDH2B7);PB.6883.1(ALDH3F1);PB.6883.2(ALDH3F1);PB.7274.1(ALDH3F1);PB.7676.1(ALDH3F1);PB.7676.2(ALDH3F1);PB.7676.3(ALDH3F1)	K01593+K00128+K00128+K00128+K00128+K00128+K00128+K00128+K00128+K00128
Metabolism	Lipid metabolism	Ether lipid metabolism	7	32	9.41e-05	0.000988	ko00565	PB.1297.1(NPC1);PB.1297.2(NPC1);PB.1297.3(NPC1);PB.1297.4(NPC1);PB.1297.5(NPC1);PB.648.1(NPC1);PB.648.2(NPC1)	K01114+K01114+K01114+K01114+K01114+K01114+K01114
Metabolism	Metabolism of cofactors and vitamins	Porphyrin and chlorophyll metabolism	10	68	0.000111617	0.00104	ko00860	PB.12924.1(HEMB);PB.12924.3(HEMB);PB.13231.1(HEMB);PB.3499.1(Os09g0297000);PB.6931.1(HEMH);PB.6931.2(HEMH);PB.7323.2(HEMH);PB.7323.3(HEMH);PB.7749.1(HEMH);PB.7749.2(HEMH)	K01698+K01698+K01698+K01772+K01772+K01772+K01772+K01772+K01772+K01772
Metabolism	Lipid metabolism	Fatty acid degradation	11	103	0.000892935	0.00682	ko00071	PB.12776.1(ALDH2B7);PB.12846.1(LACS4);PB.13568.1(ALDH2B7);PB.13568.2(ALDH2B7);PB.13639.1(LACS4);PB.6883.1(ALDH3F1);PB.6883.2(ALDH3F1);PB.7274.1(ALDH3F1);PB.7676.1(ALDH3F1);PB.7676.2(ALDH3F1);PB.7676.3(ALDH3F1)	K00128+K01897+K00128+K00128+K01897+K00128+K00128+K00128+K00128+K00128+K00128
Metabolism	Carbohydrate metabolism	Inositol phosphate metabolism	9	74	0.00103255	0.00723	ko00562	PB.1297.1(NPC1);PB.1297.2(NPC1);PB.1297.3(NPC1);PB.1297.4(NPC1);PB.1297.5(NPC1);PB.648.1(NPC1);PB.648.2(NPC1);PB.8717.1(IPK1);PB.8717.2(IPK1)	K01114+K01114+K01114+K01114+K01114+K01114+K01114+K10572+K10572
Metabolism	Carbohydrate metabolism	Ascorbate and aldarate metabolism	9	75	0.00113833	0.00736	ko00053	PB.12776.1(ALDH2B7);PB.13568.1(ALDH2B7);PB.13568.2(ALDH2B7);PB.6883.1(ALDH3F1);PB.6883.2(ALDH3F1);PB.7274.1(ALDH3F1);PB.7676.1(ALDH3F1);PB.7676.2(ALDH3F1);PB.7676.3(ALDH3F1)	K00128+K00128+K00128+K00128+K00128+K00128+K00128+K00128+K00128
Metabolism	Lipid metabolism	Glycerolipid metabolism	11	109	0.00142915	0.00857	ko00561	PB.12508.1(DGK2);PB.12508.2(DGK2);PB.12776.1(ALDH2B7);PB.13568.1(ALDH2B7);PB.13568.2(ALDH2B7);PB.6883.1(ALDH3F1);PB.6883.2(ALDH3F1);PB.7274.1(ALDH3F1);PB.7676.1(ALDH3F1);PB.7676.2(ALDH3F1);PB.7676.3(ALDH3F1)	K00901+K00901+K00128+K00128+K00128+K00128+K00128+K00128+K00128+K00128+K00128
Metabolism	Global and overview maps	Fatty acid metabolism	11	119	0.00289135	0.0143	ko01212	PB.12706.1(FATB1);PB.12706.2(FATB);PB.12846.1(LACS4);PB.13309.1(FATB1);PB.13502.2(FATB);PB.13502.3(FATB);PB.13639.1(LACS4);PB.7432.1(FATB);PB.7432.2(FATB1);PB.7432.3(FATB1);PB.7841.1(FATB)	K10781+K10781+K01897+K10781+K10781+K10781+K01897+K10781+K10781+K10781+K10781
Metabolism	Metabolism of other amino acids	beta-Alanine metabolism	9	87	0.00323419	0.0151	ko00410	PB.12776.1(ALDH2B7);PB.13568.1(ALDH2B7);PB.13568.2(ALDH2B7);PB.6883.1(ALDH3F1);PB.6883.2(ALDH3F1);PB.7274.1(ALDH3F1);PB.7676.1(ALDH3F1);PB.7676.2(ALDH3F1);PB.7676.3(ALDH3F1)	K00128+K00128+K00128+K00128+K00128+K00128+K00128+K00128+K00128
Metabolism	Amino acid metabolism	Arginine biosynthesis	7	62	0.00564362	0.025	ko00220	PB.182.1(GLN6);PB.182.2(GLN6);PB.1982.1(GLN6);PB.1982.2(GS1-5);PB.1982.3(GLN6);PB.840.1(GLN6);PB.927.1(At5g10920)	K01915+K01915+K01915+K01915+K01915+K01915+K01755
Metabolism	Carbohydrate metabolism	Pyruvate metabolism	13	170	0.00648129	0.0272	ko00620	PB.12776.1(ALDH2B7);PB.13568.1(ALDH2B7);PB.13568.2(ALDH2B7);PB.6883.1(ALDH3F1);PB.6883.2(ALDH3F1);PB.7133.1(LDHA);PB.7274.1(ALDH3F1);PB.7676.1(ALDH3F1);PB.7676.2(ALDH3F1);PB.7676.3(ALDH3F1);PB.7930.1(LDHA);PB.7930.2(LDHA);PB.7930.3(LDHA)	K00128+K00128+K00128+K00128+K00128+K00016+K00128+K00128+K00128+K00128+K00016+K00016+K00016
Metabolism	Energy metabolism	Nitrogen metabolism	7	65	0.00731389	0.029	ko00910	PB.182.1(GLN6);PB.182.2(GLN6);PB.1982.1(GLN6);PB.1982.2(GS1-5);PB.1982.3(GLN6);PB.5467.5(BCA2);PB.840.1(GLN6)	K01915+K01915+K01915+K01915+K01915+K01673+K01915
Metabolism	Amino acid metabolism	Arginine and proline metabolism	9	99	0.007605	0.029	ko00330	PB.12776.1(ALDH2B7);PB.13568.1(ALDH2B7);PB.13568.2(ALDH2B7);PB.6883.1(ALDH3F1);PB.6883.2(ALDH3F1);PB.7274.1(ALDH3F1);PB.7676.1(ALDH3F1);PB.7676.2(ALDH3F1);PB.7676.3(ALDH3F1)	K00128+K00128+K00128+K00128+K00128+K00128+K00128+K00128+K00128
Metabolism	Metabolism of other amino acids	Cyanoamino acid metabolism	9	109	0.013878	0.0507	ko00460	PB.13756.1(BACOVA_02659);PB.2965.1(BGLU29);PB.4406.1(BGLU29);PB.4730.1(BGLU4);PB.5857.1(BGLU4);PB.6630.1(CYP79A1);PB.673.2(CYP79A1);PB.8792.1(BGLU30);PB.8792.2(BGLU30)	K05349+K01188+K01188+K01188+K01188+K13027+K13027+K01188+K01188
Metabolism	Glycan biosynthesis and metabolism	Other glycan degradation	2	7	0.0228661	0.0768	ko00511	PB.9556.1(At5g61540);PB.9556.2(At5g61540)	K01444+K01444
Metabolism	Lipid metabolism	Synthesis and degradation of ketone bodies	3	22	0.040039	0.129	ko00072	PB.3383.1(HMGS);PB.3900.1(HMGS);PB.3902.1(HMGS)	K01641+K01641+K01641
Metabolism	Biosynthesis of other secondary metabolites	Phenylpropanoid biosynthesis	16	290	0.0473762	0.147	ko00940	PB.13138.1(CCOAOMT1);PB.13756.1(BACOVA_02659);PB.13886.1(PER1);PB.2965.1(BGLU29);PB.3199.1(PER70);PB.4249.1(PER70);PB.4249.2(PER70);PB.4406.1(BGLU29);PB.4730.1(BGLU4);PB.4941.1(ALDH2C4);PB.4941.2(ALDH2C4);PB.5857.1(BGLU4);PB.8792.1(BGLU30);PB.8792.2(BGLU30);PB.9823.1(PER50);PB.9823.2(PER50)	K00588+K05349+K00430+K01188+K00430+K00430+K00430+K01188+K01188+K12355+K12355+K01188+K01188+K01188+K00430+K00430
Metabolism	Carbohydrate metabolism	Propanoate metabolism	4	44	0.066978	0.193	ko00640	PB.7133.1(LDHA);PB.7930.1(LDHA);PB.7930.2(LDHA);PB.7930.3(LDHA)	K00016+K00016+K00016+K00016
Metabolism	Biosynthesis of other secondary metabolites	Betalain biosynthesis	1	2	0.0688849	0.193	ko00965	PB.10596.1(TDC1)	K01593
Metabolism	Biosynthesis of other secondary metabolites	Glucosinolate biosynthesis	2	17	0.117917	0.301	ko00966	PB.6630.1(CYP79A1);PB.673.2(CYP79A1)	K13027+K13027
Metabolism	Carbohydrate metabolism	Glycolysis / Gluconeogenesis	14	282	0.118308	0.301	ko00010	PB.12491.2(ENO2);PB.12776.1(ALDH2B7);PB.13568.1(ALDH2B7);PB.13568.2(ALDH2B7);PB.6883.1(ALDH3F1);PB.6883.2(ALDH3F1);PB.7133.1(LDHA);PB.7274.1(ALDH3F1);PB.7676.1(ALDH3F1);PB.7676.2(ALDH3F1);PB.7676.3(ALDH3F1);PB.7930.1(LDHA);PB.7930.2(LDHA);PB.7930.3(LDHA)	K01689+K00128+K00128+K00128+K00128+K00128+K00016+K00128+K00128+K00128+K00128+K00016+K00016+K00016
Metabolism	Glycan biosynthesis and metabolism	Glycosaminoglycan degradation	2	20	0.15407	0.381	ko00531	PB.11290.1(HGSNAT);PB.11694.1(HGSNAT)	K10532+K10532
Metabolism	Lipid metabolism	Fatty acid elongation	4	61	0.164806	0.388	ko00062	PB.13563.1(CUT1);PB.5549.1(CUT1);PB.6137.2(CUT1);PB.6137.3(CUT1)	K15397+K15397+K15397+K15397
Metabolism	Amino acid metabolism	Alanine, aspartate and glutamate metabolism	7	129	0.166291	0.388	ko00250	PB.182.1(GLN6);PB.182.2(GLN6);PB.1982.1(GLN6);PB.1982.2(GS1-5);PB.1982.3(GLN6);PB.840.1(GLN6);PB.927.1(At5g10920)	K01915+K01915+K01915+K01915+K01915+K01915+K01755
Metabolism	Global and overview maps	Biosynthesis of secondary metabolites	65	1697	0.217993	0.482	ko01110	PB.10407.1(At1g07440);PB.10596.1(TDC1);PB.12491.2(ENO2);PB.12508.1(DGK2);PB.12508.2(DGK2);PB.12776.1(ALDH2B7);PB.12924.1(HEMB);PB.12924.3(HEMB);PB.1297.1(NPC1);PB.1297.2(NPC1);PB.1297.3(NPC1);PB.1297.4(NPC1);PB.1297.5(NPC1);PB.13138.1(CCOAOMT1);PB.13231.1(HEMB);PB.13563.1(CUT1);PB.13568.1(ALDH2B7);PB.13568.2(ALDH2B7);PB.13756.1(BACOVA_02659);PB.13886.1(PER1);PB.1616.1(At1g31550);PB.2492.1(ZSD1);P…	K08081+K01593+K01689+K00901+K00901+K00128+K01698+K01698+K01114+K01114+K01114+K01114+K01114+K00588+K01698+K15397+K00128+K00128+K05349+K00430+K21026+K09841+K01188+K00430+K01641+K01772+K01641+K01641+K00430+K00430+K01188+K01188+K15397+K01188+K00940+K00940+K15397+K15397+K01114+K01114+K13027+K13027+K00128+K00128+K01772+K01772+K00016+K00128+K15404+K01772+K01772+K00128+K00128+K00128+K01772+K01772+K00016+…
Metabolism	Metabolism of cofactors and vitamins	Nicotinate and nicotinamide metabolism	2	28	0.257234	0.514	ko00760	PB.5771.1(Os01g0957000);PB.5803.1(Os01g0957000)	K00858+K00858
Metabolism	Carbohydrate metabolism	Starch and sucrose metabolism	7	164	0.352066	0.672	ko00500	PB.13756.1(BACOVA_02659);PB.2965.1(BGLU29);PB.4406.1(BGLU29);PB.4730.1(BGLU4);PB.5857.1(BGLU4);PB.8792.1(BGLU30);PB.8792.2(BGLU30)	K05349+K01188+K01188+K01188+K01188+K01188+K01188
Metabolism	Metabolism of terpenoids and polyketides	Terpenoid backbone biosynthesis	3	63	0.380758	0.711	ko00900	PB.3383.1(HMGS);PB.3900.1(HMGS);PB.3902.1(HMGS)	K01641+K01641+K01641
Metabolism	Biosynthesis of other secondary metabolites	Indole alkaloid biosynthesis	2	41	0.424064	0.758	ko00901	PB.10596.1(TDC1);PB.1616.1(At1g31550)	K01593+K21026
Metabolism	Global and overview maps	Metabolic pathways	99	2782	0.445263	0.766	ko01100	PB.10011.1(--);PB.10407.1(At1g07440);PB.10596.1(TDC1);PB.10966.1(GATB);PB.10987.1(GATB);PB.11290.1(HGSNAT);PB.11694.1(HGSNAT);PB.12491.2(ENO2);PB.12508.1(DGK2);PB.12508.2(DGK2);PB.12706.1(FATB1);PB.12706.2(FATB);PB.12776.1(ALDH2B7);PB.12846.1(LACS4);PB.12924.1(HEMB);PB.12924.3(HEMB);PB.1297.1(NPC1);PB.1297.2(NPC1);PB.1297.3(NPC1);PB.1297.4(NPC1);PB.1297.5(NPC1);PB.13138.1(CCOAOMT1);PB.13231.1(HEM…	K02723+K08081+K01593+K02434+K02434+K10532+K10532+K01689+K00901+K00901+K10781+K10781+K00128+K01897+K01698+K01698+K01114+K01114+K01114+K01114+K01114+K00588+K01698+K10781+K10781+K10781+K15397+K00128+K00128+K01897+K05349+K00430+K03963+K01915+K01915+K01915+K01915+K01915+K09841+K02134+K01188+K03017+K00430+K01641+K01772+K01641+K01641+K03017+K00430+K00430+K01188+K18151+K01188+K02563+K15397+K00858+K00858+…
Metabolism	Carbohydrate metabolism	Butanoate metabolism	3	70	0.446989	0.766	ko00650	PB.3383.1(HMGS);PB.3900.1(HMGS);PB.3902.1(HMGS)	K01641+K01641+K01641
Metabolism	Biosynthesis of other secondary metabolites	Tropane, piperidine and pyridine alkaloid biosynthesis	1	18	0.474385	0.797	ko00960	PB.10407.1(At1g07440)	K08081
Metabolism	Biosynthesis of other secondary metabolites	Isoquinoline alkaloid biosynthesis	1	21	0.527902	0.851	ko00950	PB.10596.1(TDC1)	K01593
Metabolism	Glycan biosynthesis and metabolism	Glycosylphosphatidylinositol(GPI)-anchor biosynthesis	1	22	0.544506	0.851	ko00563	PB.9405.1(At1g61280)	K03861
Metabolism	Carbohydrate metabolism	Glyoxylate and dicarboxylate metabolism	6	169	0.54676	0.851	ko00630	PB.182.1(GLN6);PB.182.2(GLN6);PB.1982.1(GLN6);PB.1982.2(GS1-5);PB.1982.3(GLN6);PB.840.1(GLN6)	K01915+K01915+K01915+K01915+K01915+K01915
Metabolism	Amino acid metabolism	Tyrosine metabolism	2	54	0.569858	0.87	ko00350	PB.10596.1(TDC1);PB.7853.1(FAH)	K01593+K01555
Metabolism	Nucleotide metabolism	Pyrimidine metabolism	5	150	0.609801	0.915	ko00240	PB.3113.1(NRPB9A);PB.4227.1(NRPB9B);PB.6110.1(NDK4);PB.6110.2(NDK4);PB.6339.1(UMPS1)	K03017+K03017+K00940+K00940+K13421
Metabolism	Energy metabolism	Oxidative phosphorylation	7	213	0.624331	0.92	ko00190	PB.11943.1(IPP);PB.11943.2(IPP);PB.1429.1(At2g02050);PB.2789.1(At5g47030);PB.585.1(COX6A);PB.7083.1(VHA-A);PB.7083.2(CVA69.24)	K01507+K01507+K03963+K02134+K02266+K02145+K02145
Metabolism	Amino acid metabolism	Phenylalanine metabolism	2	61	0.636632	0.922	ko00360	PB.10596.1(TDC1);PB.13138.1(CCOAOMT1)	K01593+K00588
Metabolism	Metabolism of cofactors and vitamins	Riboflavin metabolism	1	30	0.658028	0.923	ko00740	PB.9435.1(At2g44050)	K00794
Metabolism	Metabolism of terpenoids and polyketides	Carotenoid biosynthesis	1	31	0.670073	0.923	ko00906	PB.2492.1(ZSD1)	K09841
Metabolism	Biosynthesis of other secondary metabolites	Stilbenoid, diarylheptanoid and gingerol biosynthesis	1	32	0.681696	0.924	ko00945	PB.13138.1(CCOAOMT1)	K00588
Metabolism	Nucleotide metabolism	Purine metabolism	5	181	0.767442	0.952	ko00230	PB.3113.1(NRPB9A);PB.4227.1(NRPB9B);PB.4664.1(UAH);PB.6110.1(NDK4);PB.6110.2(NDK4)	K03017+K03017+K18151+K00940+K00940
Metabolism	Energy metabolism	Photosynthesis	3	114	0.769207	0.952	ko00195	PB.10011.1(--);PB.11185.1(FDX6);PB.11939.1(FDX6)	K02723+K02639+K02639
Metabolism	Amino acid metabolism	Cysteine and methionine metabolism	4	171	0.856668	1	ko00270	PB.7133.1(LDHA);PB.7930.1(LDHA);PB.7930.2(LDHA);PB.7930.3(LDHA)	K00016+K00016+K00016+K00016
Metabolism	Global and overview maps	2-Oxocarboxylic acid metabolism	2	97	0.860082	1	ko01210	PB.6630.1(CYP79A1);PB.673.2(CYP79A1)	K13027+K13027
Metabolism	Carbohydrate metabolism	Pentose and glucuronate interconversions	1	60	0.883668	1	ko00040	PB.12526.1(At1g67750)	K01728
Metabolism	Biosynthesis of other secondary metabolites	Flavonoid biosynthesis	1	102	0.97452	1	ko00941	PB.13138.1(CCOAOMT1)	K00588
Metabolism	Global and overview maps	Biosynthesis of amino acids	8	405	0.977056	1	ko01230	PB.12491.2(ENO2);PB.182.1(GLN6);PB.182.2(GLN6);PB.1982.1(GLN6);PB.1982.2(GS1-5);PB.1982.3(GLN6);PB.840.1(GLN6);PB.927.1(At5g10920)	K01689+K01915+K01915+K01915+K01915+K01915+K01915+K01755
Metabolism	Carbohydrate metabolism	Fructose and mannose metabolism	1	137	0.992869	1	ko00051	PB.2027.1(FKFBP)	K01103
Metabolism	Metabolism of other amino acids	Glutathione metabolism	1	160	0.996924	1	ko00480	PB.1641.1(GSTU6)	K00799
Metabolism	Global and overview maps	Carbon metabolism	1	569	1	1	ko01200	PB.12491.2(ENO2)	K01689
Organismal Systems	Environmental adaptation	Plant-pathogen interaction	12	271	0.241384	0.514	ko04626	PB.13563.1(CUT1);PB.13696.1(MYB93);PB.1840.1(CPK9);PB.4112.1(PRMS);PB.4114.1(PRMS);PB.4114.2(PRMS);PB.4115.1(PRMS);PB.4115.3(PRMS);PB.5549.1(CUT1);PB.6137.2(CUT1);PB.6137.3(CUT1);PB.977.1(MYB86)	K15397+K09422+K13412+K13449+K13449+K13449+K13449+K13449+K15397+K15397+K15397+K09422
